# Supplementary material for: Temperature-modulated crystal growth and performance for highly reproducible and efficient perovskite solar cells
Source: Royal Society of Chemistry journal article supplement (doi:10.1039/c7cp00563f), 2017-01-01
Supplement: c7cp00563f1.pdf [file c7cp00563f1.pdf]

## Temperature-Modulated Crystal Growth and Performance for Highly Reproducible and Efficient Perovskite Solar Cells

Tongyu Su,<sup>abc</sup> Xinhang Li,<sup>a</sup> Yongzhuan Zhang,<sup>a</sup> Fapei Zhang<sup>\*a</sup> and Zhigao Sheng<sup>\*ac</sup>

<sup>a</sup>High Magnetic Field Laboratory, Chinese Academy of Sciences, Hefei 230031, China.

<sup>b</sup>University of Science and Technology of China, Hefei 230026, China.

<sup>c</sup>Collaborative Innovation Center of Advanced Microstructures, Nanjing University, Nanjing, 210093, China.

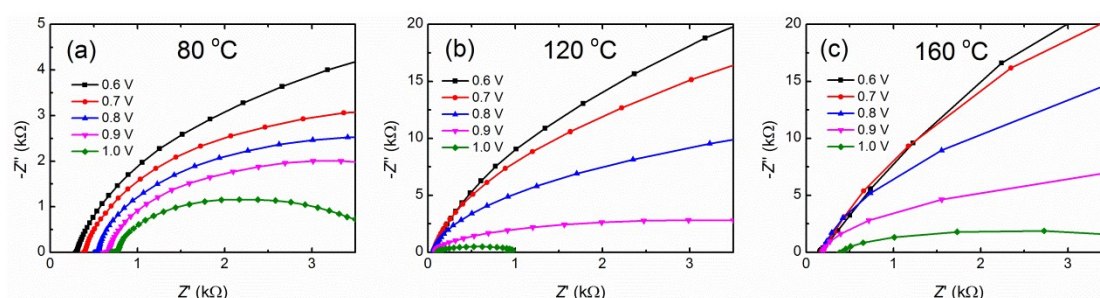

**Fig. S1** Nyquist plots at different bias for the devices prepared at various  $T_a$ .

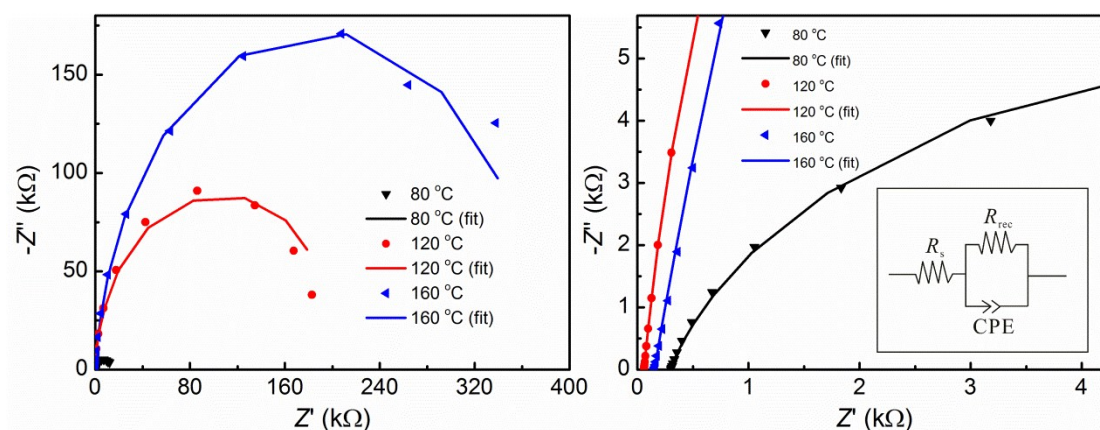

**Fig. S2** (a) Nyquist plots at 0.6 V for devices with the perovskite films prepared at various  $T_a$ . (b) A zoom-in of the high-frequency region of Nyquist plots. Inset is equivalent circuit for fitting IS.

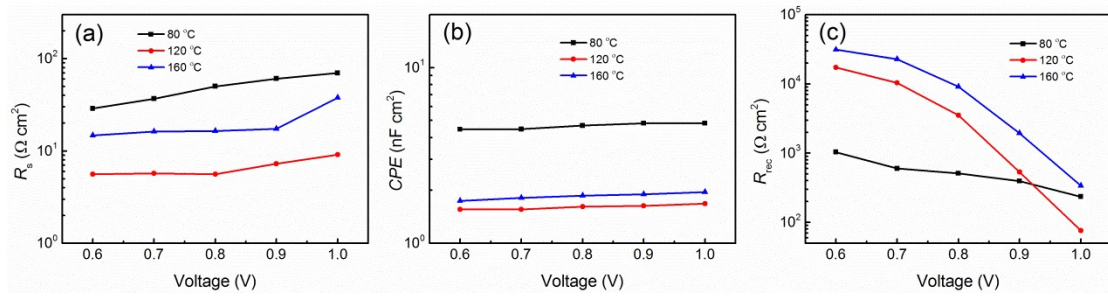

**Fig. S3** (a) Series resistance ( $R_s$ ), (b) constant phase element ( $CPE$ ), and (c) recombination resistance ( $R_{rec}$ ) as a function of bias.

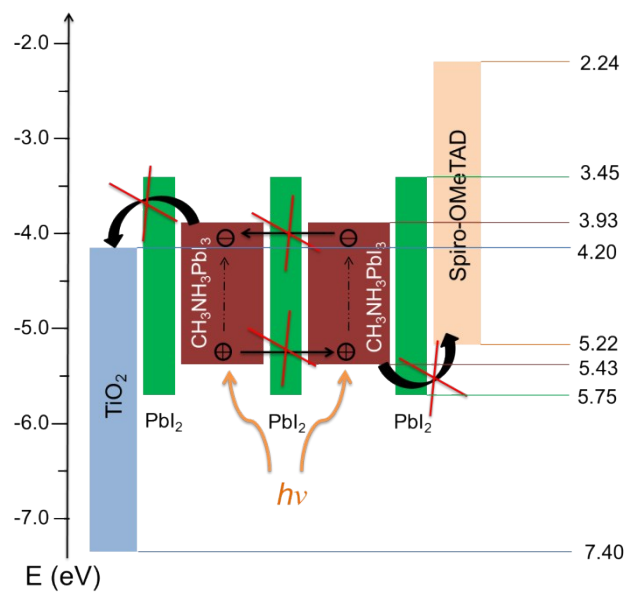

**Fig. S4** Energy band gap diagram of the device at  $T_a > 120 \text{ }^\circ\text{C}$
